# Supplementary material for: Trends in molecular characteristics and antimicrobial resistance of group B streptococci: a multicenter study in Serbia, 2015–2020
Source: PubMed Central journal article supplement (PMC7804007; doi:10.1038/s41598-020-79354-3), 2021-01-12
Supplement: 41598_2020_79354_MOESM1_ESM.pdf [file 41598_2020_79354_MOESM1_ESM.pdf]

Supplementary Information file

TITLE PAGE

**Trends in molecular characteristics and antimicrobial resistance of group B streptococci: a multicenter study in Serbia, 2015–2020**

Dusan Kekic<sup>1\*+</sup>, Ina Gajic<sup>1+</sup>, Natasa Opavski<sup>1</sup>, Milan Kojic<sup>2</sup>, Goran Vukotic<sup>2,3</sup>, Aleksandra Smitran<sup>4</sup>, Lidija Boskovic<sup>5</sup>, Marina Stojkovic<sup>6</sup>, Lazar Ranin<sup>1</sup>

<sup>1</sup> Institute for Microbiology and Immunology, Medical Faculty, University of Belgrade, 11000 Belgrade, Serbia

<sup>2</sup> Institute of Molecular Genetics and Genetic Engineering, University of Belgrade, Belgrade, 11000 Belgrade, Serbia

<sup>3</sup> Faculty of Biology, University of Belgrade, Belgrade, 11000 Belgrade, Serbia

<sup>4</sup> Institute for Microbiology and Immunology, Medical Faculty, University of Banja Luka, 78000, Banja Luka, Bosnia and Herzegovina

<sup>5</sup> Department for Microbiology, University Hospital Center “Dr Dragisa Misovic”, 11000 Belgrade, Serbia

<sup>6</sup> Department for Microbiology, The Obstetrics and Gynaecology Clinic “Narodni Front”, 11000 Belgrade, Serbia

**\*Corresponding author:** Institute for microbiology and immunology, Medical Faculty, University of Belgrade, Dr Subotica no.1, 11000 Belgrade, Serbia; e-mail: dusan\_vk@yahoo.com

**+ equally contributed**

Supplementary Figure S1 - Trends of capsular types distribution of Group B streptococci among asymptotically colonised pregnant women (n=877)

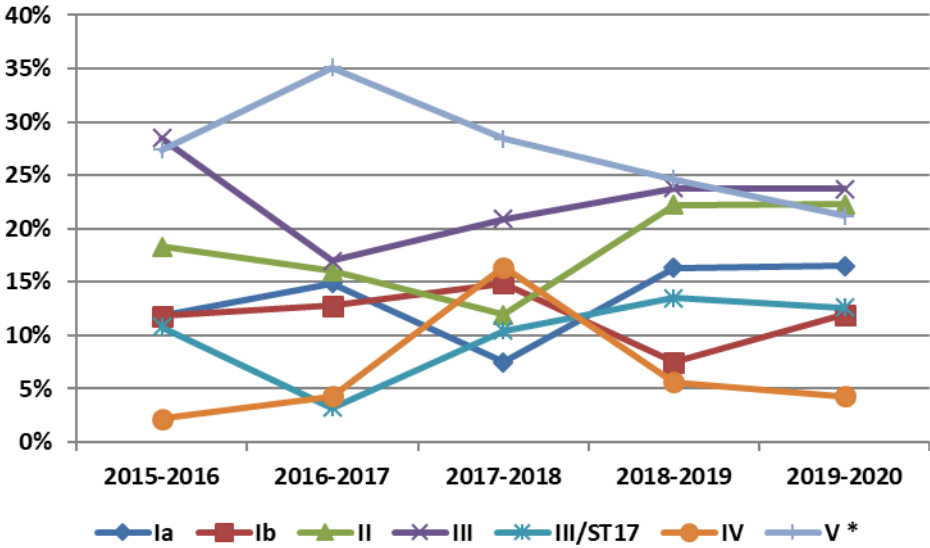

\*Significant decrease in the trend of CPS type V (27.4% to 21.2%) during the study period (p (CA)=0.0327)

Supplementary Figure S2 - Trends of capsular types distribution of Group B streptococci among non-pregnant adults with urogenital infection (n=114)

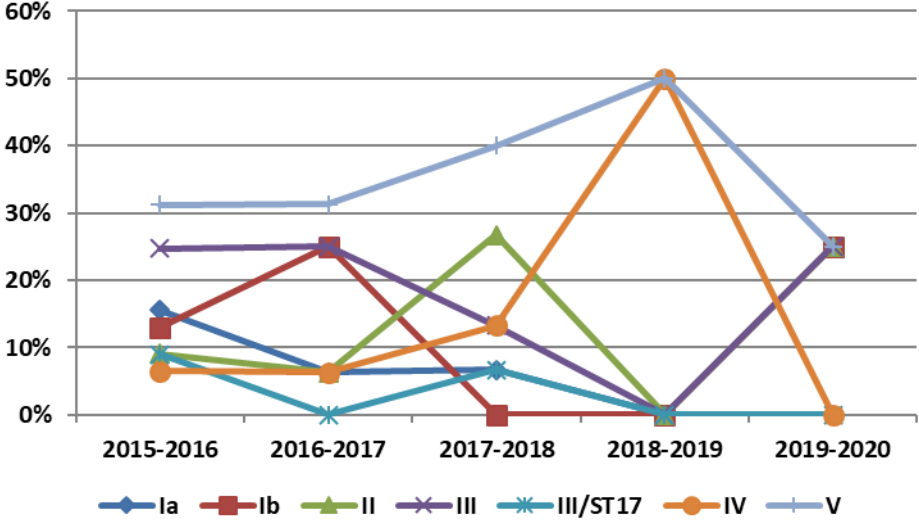

No significant changes in the trend of the CPS types distribution during the study period.

Supplementary Figure S3- Trends of capsular types distribution of Group B streptococci among neonates with invasive infections (n=60)

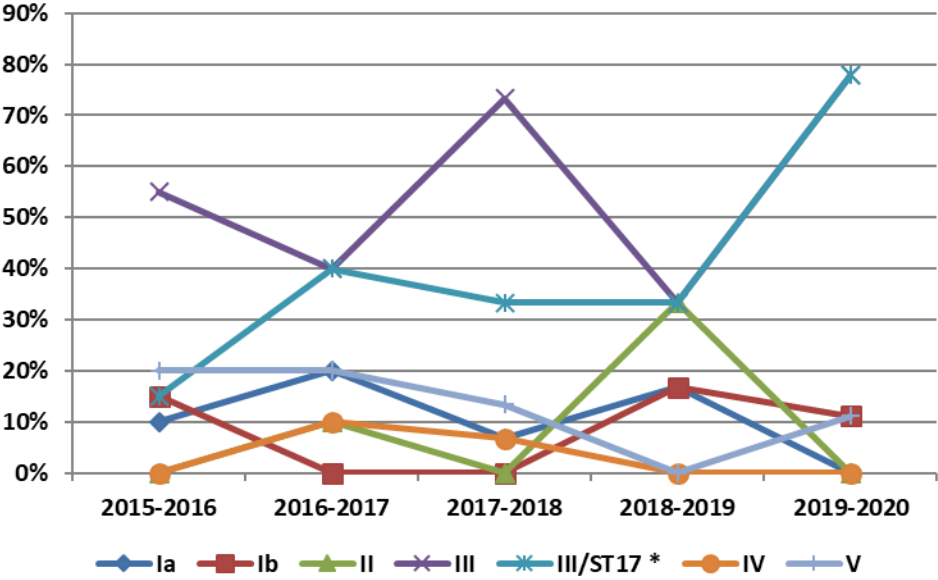

\* Significant increase in the trend of the hypervirulent clone III/ST17 (15% to 77.8%) during the study period (p(CA)=0.0040)

Supplementary Figure S4 - PFGE gel 1

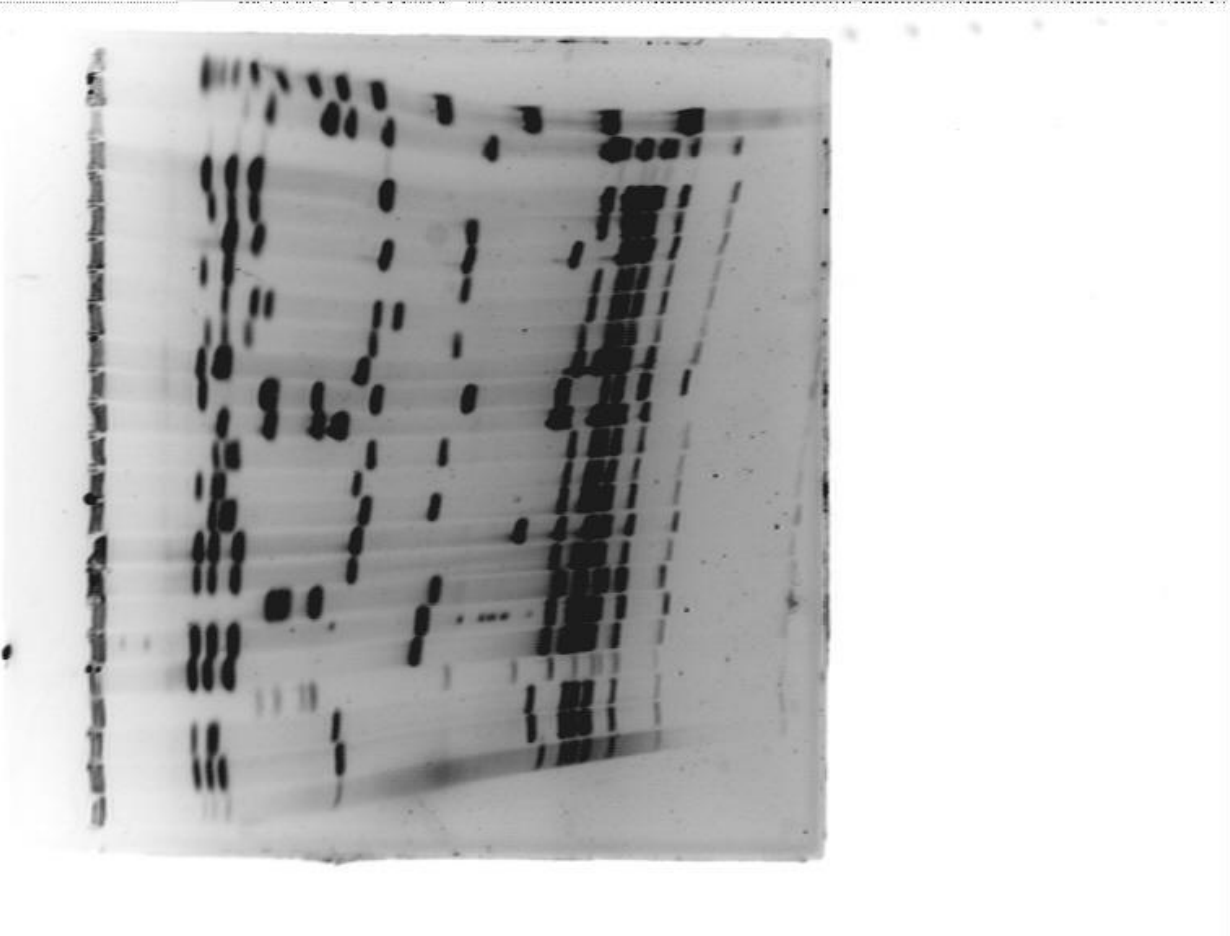

Supplementary Figure S5 - PFGE gel 2

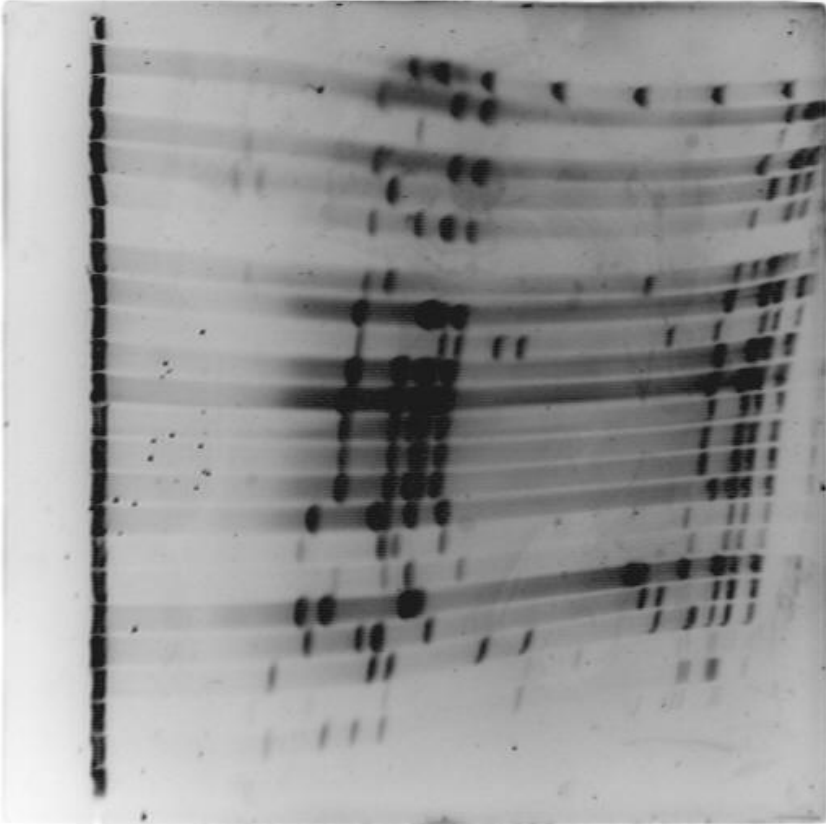

Supplementary Figure S6 - PFGE gel 3

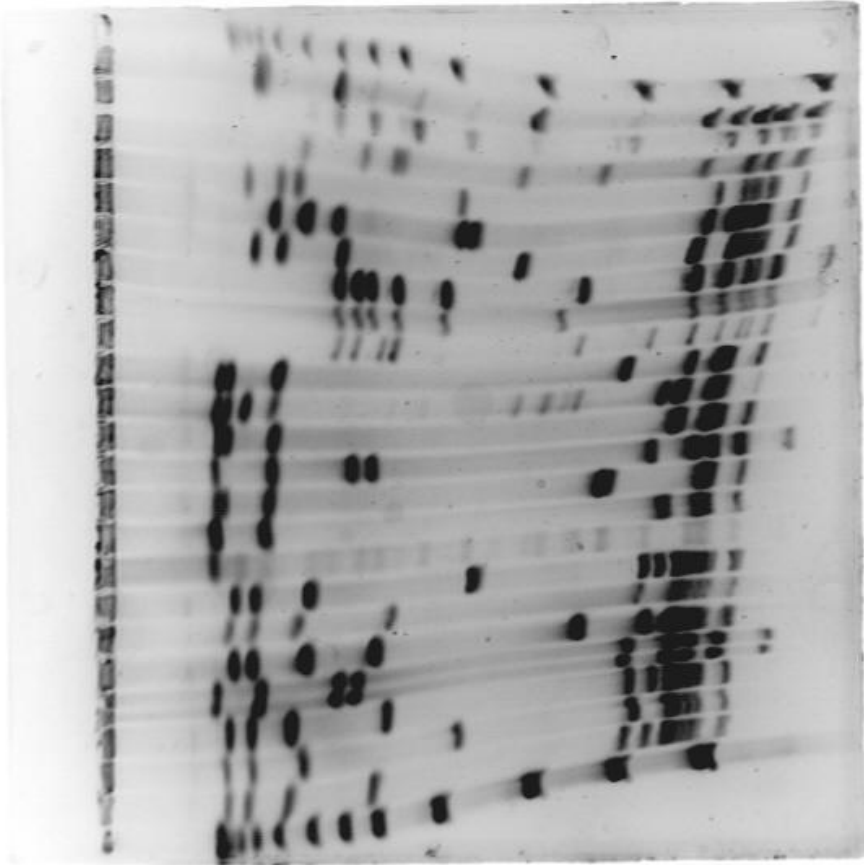

Supplementary Table 1 - The trend of the proportion of the hypervirulent clone III/ST17 within isolates of the capsular type III from 2015 to 2020.

|                | 2015-2016 | 2016-2017 | 2017-2018 | 2018-2019 | 2019-2020 | p (CA) |
|----------------|-----------|-----------|-----------|-----------|-----------|--------|
| III/ST17 N (%) | 35 (41.7) | 8 (30.8)  | 13 (48.1) | 36 (57.1) | 44 (57.9) | 0.0082 |



Supplementary Table 2 - Trends of the overall resistance rates of Group B streptococci to erythromycin, clindamycin, and tetracycline from 2015 to 2020.

|                    | 2015-2016  | 2016-2017  | 2017-2018 | 2018-2019  | 2019-2020  | p (CA) |
|--------------------|------------|------------|-----------|------------|------------|--------|
| Erythromycin N (%) | 56 (19.7)  | 30 (24.4)  | 35 (34.0) | 76 (29.6)  | 89 (29.2)  | 0.0035 |
| Clindamycin N (%)  | 49 (17.3)  | 26 (21.1)  | 29 (28.2) | 59 (23.2)  | 74 (24.1)  | 0.0323 |
| Tetracycline N (%) | 233 (82.0) | 103 (83.7) | 89 (86.4) | 218 (82.6) | 270 (90.9) | 0.0162 |

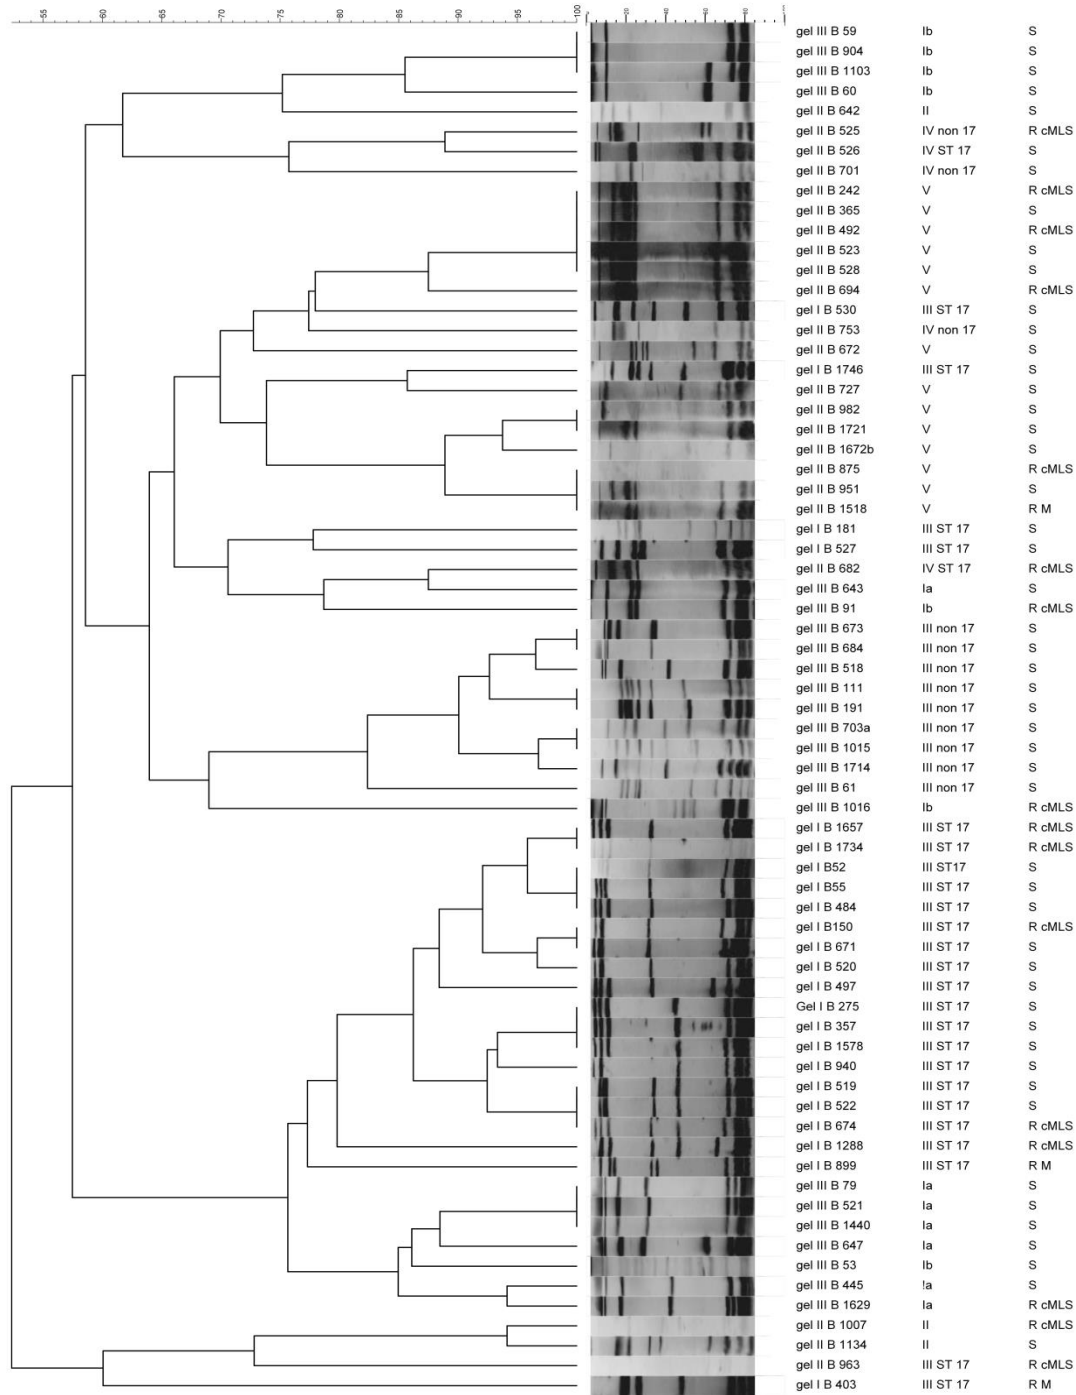

Figure 2 from the Manuscript, created by BioNumerics software. In the submitted Manuscript Figure 2 is edited for marking the 80% on the dendrogram, marking the Clusters (A-F) that we comment in the Discussion, Headers of the columns on the right, and uniforming the markings III/ST17 or non/ST17, IV/ST17 or non/ST17 like we use in the text of the Manuscript.
